# Supplementary material
Source: HighWire-hosted journal article supplement (https://bmjopen.bmj.com/content/12/4/e059395)
Supplement: inline-supplementary-material-1 [file inline-supplementary-material-1.pdf]

---

## Supplementary Materials

### Contents

|                                    |   |
|------------------------------------|---|
| Part A: calculation formulas.....  | 2 |
| Part B: supplementary figure ..... | 3 |
| Part C: supplementary tables.....  | 4 |

## Part A: calculation formulas

### 1. Gini decomposition method

The Gini decomposition formulas are as follows:

$$\Delta G = G_1 - G_0 \equiv R - P \quad (1)$$

$$R = G_1 - G_1^{(0)} \quad (2)$$

$$P = G_0 - G_1^{(0)} \quad (3)$$

Where  $G_1$  and  $G_0$  represent  $G$  in the 0th and the 1st years, respectively.  $G_1^{(0)}$  also known as the concentration coefficient, is the  $G$  in the 1st year based on the ranks in the 0th year.  $\Delta G$  is the difference in the  $G$  in different years, and can be decomposed into reranking ( $R$ ) and proportionality ( $P$ ).  $R$  represents the importance of the  $G$  change from reranking of causes and indicates the mobility of mortality causes. A higher and lower indicates greater and smaller rank changes, respectively. At a constant rank,  $R=0$ , and, when the rank is completely reversed,  $R=2G_1$ .  $P$  indicates the change in the  $G$  that accounts for the proportion, when ranking is held constant at the original distribution; thus,  $P$  indicates the progressivity of mortality causes. Table S1 presents relationships among  $P$ -values, aggregate rates, and mortality causes.

### 2. Mortality-rate-difference method

The crude mortality rate (CMR) difference equates to the sum of the age structure difference (weighted by the mean mortality rate) and mortality difference (weighted by the age structure). Assume that we have two comparison 1991 and 2019 for which we have the CMR and populations data by age groups. We use  $M$  to express the CMR,  $C$  to express the age structure, and  $x$  to express age groups. In this study, we use 5-year age groups. Thus, the CMR difference between 1991 and 2019 can be calculated using the following steps.<sup>1,2</sup>

Step 1: Determine the population proportion and mortality rate by age group (5-year-old for one group) in 1991 and 2019.

Step 2: Calculate the difference of population proportion by age:  $C_x^{2019} - C_x^{1991}$ .

Step 3: Calculate weight 1:  $(M_x^{2019} + M_x^{1991})/2$ .

Step 4: Calculate the effect of age structure difference:  $\sum_0^\infty (C_x^{2019} - C_x^{1991}) \times \frac{M_x^{2019} + M_x^{1991}}{2}$ .

Step 5: Calculate age-specific mortality difference between 1991 and 2019:  $M_x^{2019} - M_x^{1991}$ .

Step 6: Calculate weight 2:  $(C_x^{2019} + C_x^{1991})/2$ .

Step 7: Calculate the effect of mortality difference:  $\sum_0^\infty (M_x^{2019} - M_x^{1991}) \times \frac{C_x^{2019} + C_x^{1991}}{2}$ .

The CMR difference is expressed as values and percentages.

<sup>1</sup> Kitagawa, E.Y. Components of a difference between two rates. JASA 1955;50(272): 1168-1194.

<sup>2</sup> Zhai Z, Lu L, Luo M, et al. Modern population analysis techniques: China Renmin University Press 1989.

---

**Part B: supplementary figure**

Figure S1. Lorenz curve for secondary-cause standardized mortality rates ranked from lowest to

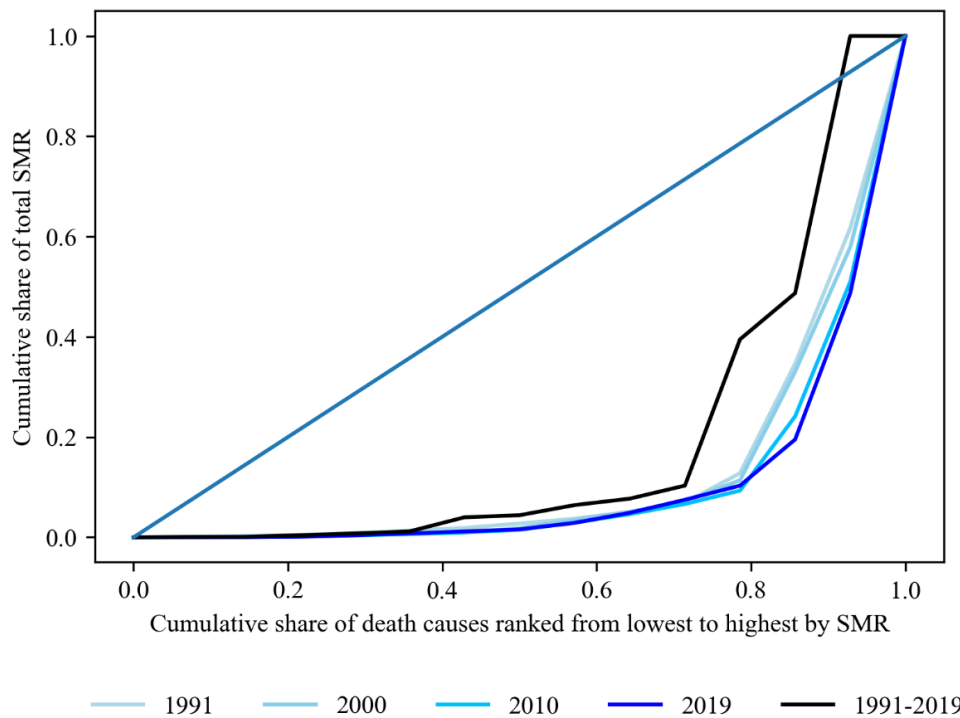

highest by contribution to the all-cause standardized mortality rates of non-communicable diseases, from 1991 to 2019.

SMR: standardized mortality rate.

---

**Part C: supplementary tables****Table S1. Association between proportionality index and attributable causes**

| <b>Aggregate Rate</b> | <b>Proportionality (<i>P</i>)</b> | <b>Causes responsible for growth/decline</b> |
|-----------------------|-----------------------------------|----------------------------------------------|
| Growing               | + <i>P</i>                        | Low-ranking                                  |
|                       | - <i>P</i>                        | High-ranking                                 |
| Declining             | + <i>P</i>                        | High-ranking                                 |
|                       | - <i>P</i>                        | Low-ranking                                  |

**Table S2. Changes in ranks and proportion of secondary causes for the combined and, male, female, rural, and urban categories, from 1991 to 2019**

|                                                   | 1991  |            | 2000  |            | 2010  |            | 2019  |            |
|---------------------------------------------------|-------|------------|-------|------------|-------|------------|-------|------------|
|                                                   | Rank* | Proportion | Rank* | Proportion | Rank* | Proportion | Rank* | Proportion |
| <b>Total</b>                                      |       |            |       |            |       |            |       |            |
| <b>CMNN</b>                                       |       |            |       |            |       |            |       |            |
| <i>total</i>                                      |       | 100%       |       | 100%       |       | 100%       |       | 100%       |
| Infectious and parasitic diseases                 | 1     | 36.00%     | 2     | 29.09%     | 2     | 32.45%     | 2     | 31.14%     |
| Respiratory infections                            | 2     | 36.22%     | 1     | 48.63%     | 1     | 49.63%     | 1     | 54.31%     |
| Conditions arising during the perinatal period    | 3     | 22.64%     | 3     | 17.72%     | 3     | 13.22%     | 3     | 5.66%      |
| Nutritional deficiencies                          | 4     | 2.96%      | 4     | 3.35%      | 4     | 3.93%      | 4     | 8.58%      |
| Pregnancy, childbirth and puerperal complications | 5     | 2.17%      | 5     | 1.21%      | 5     | 0.78%      | 5     | 0.31%      |
| <b>NCD</b>                                        |       |            |       |            |       |            |       |            |
| <i>total</i>                                      |       | 100%       |       | 100%       |       | 100%       |       | 100%       |
| Cardiovascular diseases                           | 1     | 44.73%     | 1     | 54.47%     | 1     | 48.51%     | 1     | 53.22%     |
| Respiratory diseases                              | 2     | 31.55%     | 2     | 28.59%     | 3     | 14.42%     | 3     | 9.95%      |
| Malignant neoplasms                               | 3     | 7.65%      | 4     | 2.95%      | 2     | 27.92%     | 2     | 27.23%     |
| Digestive diseases                                | 4     | 7.16%      | 3     | 5.21%      | 4     | 2.68%      | 5     | 2.46%      |
| Genito-urinary diseases                           | 5     | 2.14%      | 5     | 2.58%      | 7     | 1.44%      | 7     | 1.18%      |
| Congenital anomalies                              | 6     | 1.74%      | 8     | 0.96%      | 8     | 0.48%      | 11    | 0.22%      |
| Neuro-psychiatric conditions                      | 7     | 1.68%      | 6     | 2.08%      | 6     | 1.54%      | 6     | 1.90%      |
| Diabetes mellitus                                 | 8     | 1.06%      | 7     | 2.01%      | 5     | 2.09%      | 4     | 2.79%      |
| Endocrine disorders                               | 9     | 0.67%      | 9     | 0.34%      | 10    | 0.26%      | 9     | 0.33%      |
| Musculoskeletal and connective tissue diseases    | 10    | 0.64%      | 11    | 0.26%      | 9     | 0.31%      | 8     | 0.37%      |
| Non-malignant neoplasms                           | 11    | 0.35%      | 10    | 0.29%      | 11    | 0.25%      | 10    | 0.27%      |
| Sensory organ diseases                            | 12    | 0.30%      | 13    | 0.12%      | 14    | 0.00%      | 13    | 0.01%      |
| Skin diseases                                     | 13    | 0.21%      | 12    | 0.14%      | 12    | 0.09%      | 12    | 0.08%      |
| Oral conditions                                   | 14    | 0.11%      | 14    | 0.01%      | 13    | 0.00%      | 14    | 0.00%      |
| <b>Injury</b>                                     |       |            |       |            |       |            |       |            |
| <i>total</i>                                      |       | 100%       |       | 100%       |       | 100%       |       | 100%       |
| Self-inflicted injuries                           | 1     | 32.33%     | 2     | 27.16%     | 2     | 16.45%     | 3     | 13.35%     |
| Other unintentional injuries                      | 2     | 18.32%     | 3     | 14.85%     | 4     | 13.26%     | 4     | 13.28%     |
| Road traffic accidents                            | 3     | 14.78%     | 1     | 27.22%     | 1     | 38.55%     | 1     | 31.14%     |
| Drownings                                         | 4     | 14.63%     | 4     | 11.14%     | 5     | 8.07%      | 5     | 6.98%      |
| Poisonings                                        | 5     | 6.62%      | 6     | 6.40%      | 6     | 6.03%      | 6     | 5.97%      |
| Falls                                             | 6     | 6.28%      | 5     | 6.56%      | 3     | 14.43%     | 2     | 27.09%     |
| Violence                                          | 7     | 4.03%      | 7     | 4.38%      | 7     | 1.84%      | 8     | 0.74%      |

|                                                   |    |        |    |        |    |        |    |        |
|---------------------------------------------------|----|--------|----|--------|----|--------|----|--------|
| Fires                                             | 8  | 2.31%  | 8  | 1.90%  | 8  | 1.27%  | 7  | 1.36%  |
| Other intentional injuries                        | 9  | 0.66%  | 9  | 0.40%  | 9  | 0.10%  | 9  | 0.09%  |
| War                                               | 10 | 0.04%  | 10 | 0.00%  | 10 | 0.00%  | 10 | 0.00%  |
| <b>Male</b>                                       |    |        |    |        |    |        |    |        |
| <b>CMNN</b>                                       |    |        |    |        |    |        |    |        |
| <i>total</i>                                      |    | 100%   |    | 100%   |    | 100%   |    | 100%   |
| Infectious and parasitic diseases                 | 1  | 40.83% | 2  | 33.61% | 2  | 37.76% | 2  | 36.87% |
| Respiratory infections                            | 2  | 34.24% | 1  | 45.98% | 1  | 45.54% | 1  | 51.14% |
| Conditions arising during the perinatal period    | 3  | 22.97% | 3  | 17.18% | 3  | 13.51% | 3  | 5.86%  |
| Nutritional deficiencies                          | 4  | 1.97%  | 4  | 3.24%  | 4  | 3.19%  | 4  | 6.13%  |
| Pregnancy, childbirth and puerperal complications | 5  | 0.00%  | 5  | 0.00%  | 5  | 0.00%  | 5  | 0.00%  |
| <b>NCD</b>                                        |    |        |    |        |    |        |    |        |
| <i>total</i>                                      |    | 100%   |    | 100%   |    | 100%   |    | 100%   |
| Cardiovascular diseases                           | 1  | 35.69% | 1  | 54.14% | 1  | 46.13% | 1  | 50.00% |
| Respiratory diseases                              | 2  | 25.59% | 2  | 27.94% | 3  | 14.17% | 3  | 10.33% |
| Malignant neoplasms                               | 3  | 25.04% | 4  | 3.31%  | 2  | 31.08% | 2  | 30.67% |
| Digestive diseases                                | 4  | 6.51%  | 3  | 6.10%  | 4  | 2.99%  | 4  | 2.72%  |
| Genito-urinary diseases                           | 5  | 1.98%  | 5  | 2.76%  | 6  | 1.41%  | 7  | 1.22%  |
| Congenital anomalies                              | 6  | 1.40%  | 8  | 1.02%  | 8  | 0.47%  | 11 | 0.21%  |
| Neuro-psychiatric conditions                      | 7  | 1.37%  | 6  | 2.03%  | 7  | 1.37%  | 6  | 1.66%  |
| Diabetes mellitus                                 | 8  | 0.74%  | 7  | 1.66%  | 5  | 1.63%  | 5  | 2.33%  |
| Endocrine disorders                               | 10 | 0.37%  | 10 | 0.26%  | 9  | 0.24%  | 8  | 0.29%  |
| Musculoskeletal and connective tissue diseases    | 9  | 0.48%  | 11 | 0.20%  | 11 | 0.21%  | 9  | 0.26%  |
| Non-malignant neoplasms                           | 11 | 0.30%  | 9  | 0.28%  | 10 | 0.24%  | 10 | 0.25%  |
| Sensory organ diseases                            | 12 | 0.25%  | 12 | 0.20%  | 14 | 0.00%  | 13 | 0.00%  |
| Skin diseases                                     | 13 | 0.20%  | 13 | 0.10%  | 12 | 0.06%  | 12 | 0.06%  |
| Oral conditions                                   | 14 | 0.08%  | 14 | 0.01%  | 13 | 0.00%  | 14 | 0.00%  |
| <b>Injury</b>                                     |    |        |    |        |    |        |    |        |
| <i>total</i>                                      |    | 100%   |    | 100%   |    | 100%   |    | 100%   |
| Self-inflicted injuries                           | 1  | 24.41% | 2  | 21.53% | 3  | 13.12% | 4  | 12.16% |
| Other unintentional injuries                      | 2  | 21.77% | 3  | 16.88% | 2  | 14.28% | 3  | 13.39% |
| Road traffic accidents                            | 3  | 18.14% | 1  | 30.36% | 1  | 42.09% | 1  | 34.72% |
| Drownings                                         | 4  | 16.08% | 4  | 11.38% | 5  | 7.91%  | 5  | 6.75%  |
| Poisonings                                        | 5  | 6.51%  | 5  | 6.81%  | 6  | 6.29%  | 6  | 6.62%  |
| Falls                                             | 6  | 5.44%  | 6  | 6.35%  | 4  | 13.10% | 2  | 24.21% |
| Violence                                          | 7  | 4.31%  | 7  | 4.48%  | 7  | 1.85%  | 8  | 0.63%  |
| Fires                                             | 8  | 2.26%  | 8  | 1.60%  | 8  | 1.20%  | 7  | 1.40%  |

|                                                   |    |        |    |        |    |        |    |        |
|---------------------------------------------------|----|--------|----|--------|----|--------|----|--------|
| Other intentional injuries                        | 9  | 1.04%  | 9  | 0.62%  | 9  | 0.14%  | 9  | 0.12%  |
| War                                               | 10 | 0.03%  | 10 | 0.00%  | 10 | 0.00%  | 10 | 0.00%  |
| <b>Female</b>                                     |    |        |    |        |    |        |    |        |
| <b>CMNN</b>                                       |    |        |    |        |    |        |    |        |
| <i>total</i>                                      |    | 100%   |    | 100%   |    | 100%   |    | 100%   |
| Infectious and parasitic diseases                 | 2  | 30.95% | 3  | 24.15% | 2  | 24.99% | 2  | 22.88% |
| Respiratory infections                            | 1  | 39.08% | 1  | 51.57% | 1  | 55.30% | 1  | 58.97% |
| Conditions arising during the perinatal period    | 3  | 22.67% | 2  | 18.22% | 3  | 12.81% | 3  | 5.38%  |
| Nutritional deficiencies                          | 4  | 4.14%  | 4  | 3.49%  | 4  | 4.99%  | 4  | 12.08% |
| Pregnancy, childbirth and puerperal complications | 5  | 4.50%  | 5  | 2.56%  | 5  | 1.92%  | 5  | 0.69%  |
| <b>NCD</b>                                        |    |        |    |        |    |        |    |        |
| <i>total</i>                                      |    | 100%   |    | 100%   |    | 100%   |    | 100%   |
| Cardiovascular diseases                           | 1  | 40.59% | 1  | 54.87% | 1  | 51.84% | 1  | 57.56% |
| Respiratory diseases                              | 2  | 28.10% | 2  | 29.34% | 3  | 14.79% | 3  | 9.44%  |
| Malignant neoplasms                               | 3  | 17.85% | 4  | 2.53%  | 2  | 23.50% | 2  | 22.58% |
| Digestive diseases                                | 4  | 5.48%  | 3  | 4.16%  | 5  | 2.26%  | 6  | 2.12%  |
| Genito-urinary diseases                           | 5  | 1.60%  | 6  | 2.35%  | 7  | 1.48%  | 7  | 1.14%  |
| Congenital anomalies                              | 6  | 1.56%  | 8  | 0.89%  | 8  | 0.49%  | 11 | 0.23%  |
| Neuro-psychiatric conditions                      | 7  | 1.49%  | 7  | 2.15%  | 6  | 1.78%  | 5  | 2.23%  |
| Diabetes mellitus                                 | 8  | 1.10%  | 5  | 2.43%  | 4  | 2.72%  | 4  | 3.41%  |
| Endocrine disorders                               | 9  | 0.81%  | 9  | 0.43%  | 10 | 0.29%  | 9  | 0.38%  |
| Musculoskeletal and connective tissue diseases    | 10 | 0.60%  | 10 | 0.34%  | 9  | 0.45%  | 8  | 0.51%  |
| Non-malignant neoplasms                           | 11 | 0.30%  | 11 | 0.30%  | 11 | 0.27%  | 10 | 0.30%  |
| Sensory organ diseases                            | 12 | 0.25%  | 13 | 0.03%  | 14 | 0.00%  | 13 | 0.01%  |
| Skin diseases                                     | 13 | 0.15%  | 12 | 0.18%  | 12 | 0.14%  | 12 | 0.10%  |
| Oral conditions                                   | 14 | 0.11%  | 14 | 0.01%  | 13 | 0.00%  | 14 | 0.00%  |
| <b>Injury</b>                                     |    |        |    |        |    |        |    |        |
| <i>total</i>                                      |    | 100%   |    | 100%   |    | 100%   |    | 100%   |
| Self-inflicted injuries                           | 1  | 43.93% | 1  | 37.17% | 2  | 24.14% | 3  | 15.58% |
| Other unintentional injuries                      | 2  | 13.35% | 3  | 11.27% | 4  | 10.89% | 4  | 13.09% |
| Road traffic accidents                            | 3  | 12.52% | 4  | 10.72% | 5  | 8.44%  | 5  | 7.42%  |
| Drownings                                         | 4  | 9.76%  | 2  | 21.70% | 1  | 30.33% | 2  | 24.39% |
| Poisonings                                        | 5  | 7.50%  | 5  | 6.94%  | 3  | 17.53% | 1  | 32.52% |
| Falls                                             | 6  | 6.79%  | 6  | 5.68%  | 6  | 5.45%  | 6  | 4.75%  |
| Violence                                          | 7  | 3.61%  | 7  | 4.08%  | 7  | 1.77%  | 8  | 0.96%  |
| Fires                                             | 8  | 2.38%  | 8  | 2.44%  | 8  | 1.45%  | 7  | 1.30%  |
| Other intentional injuries                        | 9  | 0.10%  | 9  | 0.00%  | 9  | 0.00%  | 9  | 0.00%  |

|                                                   |    |         |    |         |    |         |    |        |
|---------------------------------------------------|----|---------|----|---------|----|---------|----|--------|
| War                                               | 10 | 0.06%   | 10 | 0.00%   | 10 | 0.00%   | 10 | 0.00%  |
| <b>Urban</b>                                      |    |         |    |         |    |         |    |        |
| <b>CMNN</b>                                       |    |         |    |         |    |         |    |        |
| <i>total</i>                                      |    | 100.00% |    | 100.00% |    | 100.00% |    | 100%   |
| Infectious and parasitic diseases                 | 1  | 43.91%  | 2  | 30.71%  | 2  | 26.69%  | 2  | 25.31% |
| Respiratory infections                            | 2  | 36.56%  | 1  | 54.21%  | 1  | 60.97%  | 1  | 63.13% |
| Conditions arising during the perinatal period    | 3  | 17.81%  | 3  | 11.51%  | 3  | 7.43%   | 3  | 4.54%  |
| Nutritional deficiencies                          | 4  | 0.63%   | 4  | 2.56%   | 4  | 4.43%   | 4  | 6.79%  |
| Pregnancy, childbirth and puerperal complications | 5  | 1.09%   | 5  | 1.02%   | 5  | 0.48%   | 5  | 0.24%  |
| <b>NCD</b>                                        |    |         |    |         |    |         |    |        |
| <i>total</i>                                      |    | 100.00% |    | 100.00% |    | 100.00% |    | 100%   |
| Cardiovascular diseases                           | 1  | 55.57%  | 1  | 61.91%  | 1  | 46.65%  | 1  | 51.38% |
| Respiratory diseases                              | 2  | 22.51%  | 2  | 19.19%  | 3  | 12.05%  | 3  | 8.81%  |
| Digestive diseases                                | 3  | 6.17%   | 3  | 4.65%   | 5  | 2.84%   | 5  | 2.67%  |
| Malignant neoplasms                               | 4  | 4.22%   | 7  | 1.62%   | 2  | 30.97%  | 2  | 29.06% |
| Neuro-psychiatric conditions                      | 5  | 2.75%   | 5  | 3.24%   | 6  | 1.71%   | 6  | 2.05%  |
| Genito-urinary diseases                           | 6  | 2.70%   | 6  | 2.89%   | 7  | 1.39%   | 7  | 1.18%  |
| Diabetes mellitus                                 | 7  | 2.54%   | 4  | 4.10%   | 4  | 2.85%   | 4  | 3.38%  |
| Congenital anomalies                              | 8  | 1.44%   | 8  | 1.09%   | 8  | 0.41%   | 11 | 0.21%  |
| Endocrine disorders                               | 9  | 0.87%   | 9  | 0.43%   | 10 | 0.35%   | 9  | 0.41%  |
| Musculoskeletal and connective tissue diseases    | 10 | 0.51%   | 11 | 0.34%   | 11 | 0.31%   | 8  | 0.43%  |
| Non-malignant neoplasms                           | 11 | 0.42%   | 10 | 0.36%   | 9  | 0.36%   | 10 | 0.33%  |
| Skin diseases                                     | 12 | 0.23%   | 12 | 0.14%   | 12 | 0.11%   | 12 | 0.07%  |
| Sensory organ diseases                            | 13 | 0.06%   | 13 | 0.03%   | 13 | 0.00%   | 13 | 0.01%  |
| Oral conditions                                   | 14 | 0.00%   | 14 | 0.00%   | 14 | 0.00%   | 14 | 0.00%  |
| <b>Injury</b>                                     |    |         |    |         |    |         |    |        |
| <i>total</i>                                      |    | 100.00% |    | 100.00% |    | 100.00% |    | 100%   |
| Road traffic accidents                            | 1  | 23.53%  | 1  | 33.96%  | 1  | 37.65%  | 2  | 29.35% |
| Self-inflicted injuries                           | 2  | 20.68%  | 2  | 16.51%  | 3  | 15.04%  | 4  | 11.72% |
| Falls                                             | 3  | 14.23%  | 3  | 14.02%  | 2  | 18.44%  | 1  | 31.39% |
| Other unintentional injuries                      | 4  | 14.04%  | 4  | 10.75%  | 4  | 12.79%  | 3  | 14.20% |
| Violence                                          | 5  | 8.73%   | 6  | 7.48%   | 7  | 2.09%   | 8  | 0.73%  |
| Drownings                                         | 6  | 8.73%   | 7  | 4.98%   | 6  | 6.28%   | 5  | 6.25%  |
| Poisonings                                        | 7  | 8.16%   | 5  | 10.59%  | 5  | 6.37%   | 6  | 4.99%  |
| Fires                                             | 8  | 0.95%   | 8  | 1.09%   | 8  | 1.14%   | 7  | 1.23%  |
| Other intentional injuries                        | 9  | 0.76%   | 9  | 0.62%   | 9  | 0.19%   | 9  | 0.14%  |
| War                                               | 10 | 0.19%   | 10 | 0.00%   | 10 | 0.00%   | 10 | 0.00%  |



| <b>Rural</b>                                      |    |         |    |         |    |         |    |        |
|---------------------------------------------------|----|---------|----|---------|----|---------|----|--------|
| <b>CMNN</b>                                       |    |         |    |         |    |         |    |        |
| <b>total</b>                                      |    | 100.00% |    | 100.00% |    | 100.00% |    | 100%   |
| Infectious and parasitic diseases                 | 1  | 35.18%  | 2  | 28.84%  | 2  | 36.08%  | 2  | 30.53% |
| Respiratory infections                            | 2  | 36.18%  | 1  | 47.85%  | 1  | 42.43%  | 1  | 42.97% |
| Conditions arising during the perinatal period    | 3  | 23.14%  | 3  | 18.61%  | 3  | 16.88%  | 4  | 5.60%  |
| Nutritional deficiencies                          | 4  | 3.20%   | 4  | 3.47%   | 4  | 3.61%   | 3  | 8.50%  |
| Pregnancy, childbirth and puerperal complications | 5  | 2.29%   | 5  | 1.24%   | 5  | 1.00%   | 5  | 0.29%  |
| <b>NCD</b>                                        |    |         |    |         |    |         |    |        |
| <b>total</b>                                      |    | 100.00% |    | 100.00% |    | 100.00% |    | 100%   |
| Cardiovascular diseases                           | 1  | 41.89%  | 1  | 52.15%  | 1  | 49.57%  | 1  | 54.09% |
| Respiratory diseases                              | 2  | 33.92%  | 2  | 31.53%  | 3  | 15.77%  | 3  | 10.49% |
| Malignant neoplasms                               | 3  | 8.54%   | 4  | 3.36%   | 2  | 26.19%  | 2  | 26.36% |
| Digestive diseases                                | 4  | 7.42%   | 3  | 5.38%   | 4  | 2.59%   | 5  | 2.37%  |
| Genito-urinary diseases                           | 5  | 1.99%   | 5  | 2.48%   | 6  | 1.46%   | 7  | 1.19%  |
| Congenital anomalies                              | 6  | 1.82%   | 8  | 0.92%   | 8  | 0.52%   | 11 | 0.22%  |
| Neuro-psychiatric conditions                      | 7  | 1.40%   | 6  | 1.72%   | 7  | 1.44%   | 6  | 1.83%  |
| Musculoskeletal and connective tissue diseases    | 8  | 0.68%   | 11 | 0.24%   | 9  | 0.31%   | 8  | 0.33%  |
| Diabetes mellitus                                 | 9  | 0.68%   | 7  | 1.36%   | 5  | 1.66%   | 4  | 2.51%  |
| Endocrine disorders                               | 10 | 0.62%   | 9  | 0.30%   | 10 | 0.21%   | 9  | 0.29%  |
| Sensory organ diseases                            | 11 | 0.36%   | 12 | 0.15%   | 14 | 0.00%   | 13 | 0.00%  |
| Non-malignant neoplasms                           | 12 | 0.34%   | 10 | 0.27%   | 11 | 0.19%   | 10 | 0.25%  |
| Skin diseases                                     | 13 | 0.21%   | 13 | 0.14%   | 12 | 0.08%   | 12 | 0.08%  |
| Oral conditions                                   | 14 | 0.14%   | 14 | 0.01%   | 13 | 0.00%   | 14 | 0.00%  |
| <b>Injury</b>                                     |    |         |    |         |    |         |    |        |
| <b>total</b>                                      |    | 100.00% |    | 100.00% |    | 100.00% |    | 100%   |
| Self-inflicted injuries                           | 1  | 33.71%  | 1  | 29.08%  | 2  | 16.96%  | 3  | 13.95% |
| Other unintentional injuries                      | 2  | 18.83%  | 3  | 15.58%  | 3  | 13.43%  | 4  | 12.95% |
| Drownings                                         | 3  | 15.33%  | 4  | 12.25%  | 5  | 8.72%   | 5  | 7.24%  |
| Road traffic accidents                            | 4  | 13.74%  | 2  | 26.01%  | 1  | 38.90%  | 1  | 31.77% |
| Poisonings                                        | 5  | 6.44%   | 5  | 5.65%   | 6  | 5.91%   | 6  | 6.33%  |
| Falls                                             | 6  | 5.33%   | 6  | 5.21%   | 4  | 12.96%  | 2  | 25.52% |
| Violence                                          | 7  | 3.47%   | 7  | 3.82%   | 7  | 1.74%   | 8  | 0.77%  |
| Fires                                             | 8  | 2.47%   | 8  | 2.05%   | 8  | 1.32%   | 7  | 1.42%  |
| Other intentional injuries                        | 9  | 0.65%   | 9  | 0.35%   | 9  | 0.07%   | 9  | 0.06%  |
| War                                               | 10 | 0.03%   | 10 | 0.00%   | 10 | 0.00%   | 10 | 0.00%  |

---

CMNN: communicable, maternal, neonatal, and nutritional diseases; NCD: non-communicable diseases. \*1 represents the highest rank.

**Table S3. Changes in ranks and proportion of neoplasms and cardiovascular diseases for the combined and, male, female, rural, and urban categories, from 1991 to 2019**

|                                    | 1991  |            | 2000  |            | 2010  |            | 2019  |            |
|------------------------------------|-------|------------|-------|------------|-------|------------|-------|------------|
|                                    | Rank* | Proportion | Rank* | Proportion | Rank* | Proportion | Rank* | Proportion |
| <b>Total</b>                       |       |            |       |            |       |            |       |            |
| <b>Neoplasms</b>                   |       |            |       |            |       |            |       |            |
| <i>total</i>                       |       | 100.00%    |       | 100.00%    |       | 100.00%    |       | 100.00%    |
| Stomach cancer                     | 1     | 21.25%     | 3     | 19.06%     | 3     | 14.88%     | 3     | 12.05%     |
| Liver cancer                       | 2     | 19.12%     | 2     | 20.35%     | 2     | 18.09%     | 2     | 15.04%     |
| Trachea, bronchus and lung cancers | 3     | 18.29%     | 1     | 21.69%     | 1     | 26.34%     | 1     | 29.22%     |
| Esophagus cancer                   | 4     | 12.66%     | 4     | 10.43%     | 5     | 8.79%      | 6     | 7.39%      |
| Other malignant neoplasms          | 5     | 7.21%      | 5     | 7.99%      | 4     | 9.36%      | 4     | 10.15%     |
| Colon and rectum cancers           | 6     | 5.50%      | 6     | 4.91%      | 6     | 6.04%      | 5     | 7.52%      |
| Leukemia                           | 7     | 4.01%      | 7     | 3.51%      | 8     | 2.65%      | 9     | 2.33%      |
| Mouth and oropharynx cancers       | 8     | 2.37%      | 8     | 2.13%      | 10    | 1.76%      | 11    | 1.85%      |
| Breast cancer                      | 9     | 1.85%      | 10    | 1.90%      | 9     | 2.39%      | 8     | 2.41%      |
| Pancreas cancer                    | 10    | 1.84%      | 9     | 2.10%      | 7     | 2.69%      | 7     | 3.69%      |
| Lymphomas and multiple myeloma     | 11    | 1.46%      | 12    | 1.25%      | 11    | 1.67%      | 10    | 2.18%      |
| Cervix uteri cancer                | 12    | 1.37%      | 13    | 1.18%      | 14    | 1.04%      | 12    | 1.64%      |
| Bladder cancer                     | 13    | 1.15%      | 11    | 1.39%      | 13    | 1.05%      | 13    | 1.27%      |
| Corpus uteri cancer                | 14    | 0.77%      | 14    | 0.86%      | 12    | 1.37%      | 16    | 0.76%      |
| Melanoma and other skin cancers    | 15    | 0.51%      | 15    | 0.53%      | 17    | 0.39%      | 17    | 0.48%      |
| Ovary cancer                       | 16    | 0.39%      | 17    | 0.34%      | 16    | 0.68%      | 15    | 0.87%      |
| Prostate cancer                    | 17    | 0.24%      | 16    | 0.38%      | 15    | 0.80%      | 14    | 1.16%      |
| <b>Cardiovascular diseases</b>     |       |            |       |            |       |            |       |            |
| <i>total</i>                       |       | 100.00%    |       | 100.00%    |       | 100.00%    |       | 100.00%    |
| Cerebrovascular disease            | 1     | 51.45%     | 1     | 56.07%     | 1     | 55.28%     | 1     | 47.17%     |
| Ischemic heart disease             | 2     | 15.42%     | 2     | 20.69%     | 2     | 34.25%     | 2     | 40.45%     |
| Hypertensive heart disease         | 3     | 14.58%     | 4     | 9.53%      | 3     | 5.04%      | 3     | 7.25%      |
| Other cardiovascular diseases      | 4     | 12.22%     | 3     | 10.41%     | 4     | 4.00%      | 4     | 3.84%      |
| Rheumatic heart disease            | 5     | 6.33%      | 5     | 3.29%      | 5     | 1.43%      | 5     | 1.29%      |
| <b>Male</b>                        |       |            |       |            |       |            |       |            |
| <b>Neoplasms</b>                   |       |            |       |            |       |            |       |            |
| <i>total</i>                       |       | 100.00%    |       | 100.00%    |       | 100.00%    |       | 100.00%    |
| Stomach cancer                     | 1     | 21.98%     | 3     | 19.91%     | 3     | 15.79%     | 3     | 12.87%     |
| Liver cancer                       | 2     | 21.82%     | 2     | 22.53%     | 2     | 20.76%     | 2     | 17.14%     |
| Trachea, bronchus and lung cancers | 3     | 20.06%     | 1     | 23.78%     | 1     | 28.43%     | 1     | 31.72%     |

|                                    |    |         |    |         |    |         |    |         |
|------------------------------------|----|---------|----|---------|----|---------|----|---------|
| Esophagus cancer                   | 4  | 13.59%  | 4  | 9.89%   | 4  | 9.89%   | 5  | 8.57%   |
| Other malignant neoplasms          | 5  | 6.30%   | 5  | 7.15%   | 5  | 8.44%   | 4  | 9.34%   |
| Colon and rectum cancers           | 6  | 4.81%   | 6  | 4.35%   | 6  | 5.44%   | 6  | 6.98%   |
| Leukemia                           | 7  | 3.29%   | 7  | 3.09%   | 8  | 2.39%   | 9  | 2.10%   |
| Mouth and oropharynx cancers       | 8  | 2.57%   | 8  | 2.18%   | 9  | 1.90%   | 8  | 2.12%   |
| Pancreas cancer                    | 9  | 1.87%   | 9  | 1.88%   | 7  | 2.45%   | 7  | 3.27%   |
| Lymphomas and multiple myeloma     | 10 | 1.53%   | 11 | 1.22%   | 10 | 1.62%   | 10 | 2.07%   |
| Bladder cancer                     | 11 | 1.17%   | 10 | 1.75%   | 12 | 1.19%   | 12 | 1.55%   |
| Melanoma and other skin cancers    | 12 | 0.48%   | 13 | 0.45%   | 13 | 0.34%   | 13 | 0.41%   |
| Prostate cancer                    | 13 | 0.38%   | 12 | 0.59%   | 11 | 1.24%   | 11 | 1.79%   |
| Breast cancer                      | 14 | 0.11%   | 14 | 0.13%   | 14 | 0.12%   | 14 | 0.06%   |
| <b>Cardiovascular diseases</b>     |    |         |    |         |    |         |    |         |
| <i>total</i>                       |    | 100.00% |    | 100.00% |    | 100.00% |    | 100.00% |
| Cerebrovascular disease            | 1  | 52.54%  | 1  | 57.77%  | 1  | 56.66%  | 1  | 49.00%  |
| Ischemic heart disease             | 2  | 16.25%  | 2  | 20.86%  | 2  | 33.49%  | 2  | 39.33%  |
| Hypertensive heart disease         | 3  | 14.22%  | 4  | 9.30%   | 3  | 4.69%   | 3  | 6.52%   |
| Other cardiovascular diseases      | 4  | 11.85%  | 3  | 9.61%   | 4  | 4.11%   | 4  | 4.11%   |
| Rheumatic heart disease            | 5  | 5.14%   | 5  | 2.46%   | 5  | 1.05%   | 5  | 1.03%   |
| <b>Female</b>                      |    |         |    |         |    |         |    |         |
| <b>Neoplasms</b>                   |    |         |    |         |    |         |    |         |
| <i>total</i>                       |    | 100.00% |    | 100.00% |    | 100.00% |    | 100.00% |
| Stomach cancer                     | 1  | 19.95%  | 2  | 17.49%  | 2  | 13.18%  | 4  | 10.53%  |
| Trachea, bronchus and lung cancers | 2  | 15.15%  | 1  | 17.81%  | 1  | 22.49%  | 1  | 24.65%  |
| Liver cancer                       | 3  | 14.33%  | 3  | 16.36%  | 3  | 13.16%  | 3  | 11.20%  |
| Esophagus cancer                   | 4  | 11.00%  | 6  | 6.77%   | 6  | 6.77%   | 7  | 5.23%   |
| Other malignant neoplasms          | 5  | 8.79%   | 5  | 9.49%   | 4  | 11.08%  | 2  | 11.63%  |
| Colon and rectum cancers           | 6  | 6.74%   | 6  | 5.91%   | 5  | 7.13%   | 5  | 8.49%   |
| Leukemia                           | 7  | 5.31%   | 8  | 4.24%   | 9  | 3.14%   | 10 | 2.74%   |
| Breast cancer                      | 8  | 4.90%   | 7  | 5.08%   | 7  | 6.58%   | 6  | 6.73%   |
| Cervix uteri cancer                | 9  | 3.80%   | 9  | 3.32%   | 11 | 2.95%   | 8  | 4.63%   |
| Corpus uteri cancer                | 10 | 2.15%   | 11 | 2.40%   | 8  | 3.91%   | 13 | 2.16%   |
| Mouth and oropharynx cancers       | 11 | 2.02%   | 12 | 2.00%   | 14 | 1.50%   | 14 | 1.36%   |
| Pancreas cancer                    | 12 | 1.80%   | 10 | 2.50%   | 10 | 3.13%   | 9  | 4.46%   |
| Lymphomas and multiple myeloma     | 13 | 1.34%   | 13 | 1.31%   | 13 | 1.77%   | 12 | 2.38%   |
| Bladder cancer                     | 14 | 1.12%   | 15 | 0.72%   | 15 | 0.78%   | 15 | 0.76%   |

|                                    |    |         |    |         |    |         |    |         |
|------------------------------------|----|---------|----|---------|----|---------|----|---------|
| Ovary cancer                       | 15 | 1.05%   | 14 | 0.94%   | 12 | 1.95%   | 11 | 2.46%   |
| Melanoma and other skin cancers    | 16 | 0.55%   | 16 | 0.69%   | 16 | 0.49%   | 16 | 0.60%   |
| <b>Cardiovascular diseases</b>     |    |         |    |         |    |         |    |         |
| <i>total</i>                       |    | 100.00% |    | 100.00% |    | 100.00% |    | 100.00% |
| Cerebrovascular disease            | 1  | 50.25%  | 1  | 54.14%  | 1  | 53.55%  | 1  | 45.03%  |
| Ischemic heart disease             | 2  | 14.46%  | 2  | 20.43%  | 2  | 35.20%  | 2  | 41.76%  |
| Other cardiovascular diseases      | 4  | 12.64%  | 3  | 11.34%  | 4  | 3.87%   | 4  | 3.52%   |
| Hypertensive heart disease         | 3  | 15.00%  | 4  | 9.83%   | 3  | 5.48%   | 3  | 8.11%   |
| Rheumatic heart disease            | 5  | 7.65%   | 5  | 4.27%   | 5  | 1.91%   | 5  | 1.59%   |
| <b>Urban</b>                       |    |         |    |         |    |         |    |         |
| <b>Neoplasms</b>                   |    |         |    |         |    |         |    |         |
| <i>total</i>                       |    | 100.00% |    | 100.00% |    | 100.00% |    | 100.00% |
| Trachea, bronchus and lung cancers | 1  | 26.27%  | 1  | 29.62%  | 1  | 28.73%  | 1  | 30.09%  |
| Liver cancer                       | 2  | 16.04%  | 2  | 16.93%  | 2  | 14.86%  | 2  | 13.16%  |
| Stomach cancer                     | 3  | 14.54%  | 3  | 13.07%  | 3  | 12.79%  | 3  | 10.84%  |
| Other malignant neoplasms          | 4  | 10.71%  | 4  | 8.99%   | 4  | 10.59%  | 4  | 10.48%  |
| Esophagus cancer                   | 5  | 7.59%   | 6  | 5.23%   | 6  | 5.94%   | 6  | 6.15%   |
| Colon and rectum cancers           | 6  | 6.76%   | 5  | 6.55%   | 5  | 7.60%   | 5  | 8.85%   |
| Leukemia                           | 7  | 3.87%   | 8  | 3.38%   | 9  | 2.50%   | 10 | 2.28%   |
| Pancreas cancer                    | 8  | 3.08%   | 7  | 3.41%   | 7  | 3.72%   | 7  | 4.38%   |
| Breast cancer                      | 9  | 2.73%   | 9  | 2.96%   | 8  | 3.06%   | 8  | 2.89%   |
| Mouth and oropharynx cancers       | 10 | 2.17%   | 10 | 2.68%   | 11 | 1.88%   | 11 | 1.79%   |
| Lymphomas and multiple myeloma     | 11 | 1.42%   | 12 | 1.57%   | 10 | 2.18%   | 9  | 2.43%   |
| Bladder cancer                     | 12 | 1.22%   | 11 | 1.95%   | 12 | 1.36%   | 14 | 1.44%   |
| Corpus uteri cancer                | 13 | 0.99%   | 15 | 0.84%   | 16 | 1.03%   | 16 | 0.69%   |
| Cervix uteri cancer                | 14 | 0.95%   | 13 | 1.08%   | 15 | 1.10%   | 13 | 1.47%   |
| Ovary cancer                       | 15 | 0.83%   | 14 | 0.98%   | 14 | 1.13%   | 15 | 1.11%   |
| Melanoma and other skin cancers    | 16 | 0.51%   | 17 | 0.28%   | 17 | 0.38%   | 17 | 0.44%   |
| Prostate cancer                    | 17 | 0.32%   | 16 | 0.49%   | 13 | 1.15%   | 12 | 1.51%   |
| <b>Cardiovascular diseases</b>     |    |         |    |         |    |         |    |         |
| <i>total</i>                       |    | 100.00% |    | 100.00% |    | 100.00% |    | 100.00% |
| Cerebrovascular disease            | 1  | 54.91%  | 1  | 53.06%  | 1  | 49.38%  | 1  | 45.16%  |
| Ischemic heart disease             | 2  | 21.71%  | 2  | 27.05%  | 2  | 38.69%  | 2  | 42.62%  |
| Hypertensive heart disease         | 3  | 10.44%  | 4  | 7.75%   | 4  | 5.02%   | 3  | 6.62%   |
| Other cardiovascular diseases      | 4  | 9.00%   | 3  | 9.98%   | 3  | 5.67%   | 4  | 4.37%   |
| Rheumatic heart disease            | 5  | 3.95%   | 5  | 2.16%   | 5  | 1.24%   | 5  | 1.24%   |

| <b>Rural</b>                       |    |         |    |         |    |         |    |         |
|------------------------------------|----|---------|----|---------|----|---------|----|---------|
| <b>Neoplasms</b>                   |    |         |    |         |    |         |    |         |
| <b>total</b>                       |    | 100.00% |    | 100.00% |    | 100.00% |    | 100.00% |
| Stomach cancer                     | 1  | 21.25%  | 3  | 19.06%  | 3  | 16.27%  | 3  | 12.67%  |
| Liver cancer                       | 2  | 19.12%  | 2  | 20.35%  | 2  | 20.25%  | 2  | 16.02%  |
| Trachea, bronchus and lung cancers | 3  | 18.29%  | 1  | 21.69%  | 1  | 24.74%  | 1  | 28.78%  |
| esophagus cancer                   | 4  | 12.66%  | 4  | 10.43%  | 4  | 10.70%  | 5  | 8.04%   |
| Other malignant neoplasms          | 5  | 7.21%   | 5  | 7.99%   | 5  | 8.55%   | 4  | 9.98%   |
| Colon and rectum cancers           | 6  | 5.50%   | 6  | 4.91%   | 6  | 4.99%   | 6  | 6.81%   |
| Leukemia                           | 7  | 4.01%   | 7  | 3.51%   | 7  | 2.75%   | 8  | 2.35%   |
| Mouth and oropharynx cancers       | 8  | 2.37%   | 8  | 2.13%   | 10 | 1.68%   | 11 | 1.88%   |
| Breast cancer                      | 9  | 1.85%   | 10 | 1.90%   | 9  | 1.94%   | 9  | 2.16%   |
| Pancreas cancer                    | 10 | 1.84%   | 9  | 2.10%   | 8  | 2.00%   | 7  | 3.34%   |
| Lymphomas and multiple myeloma     | 11 | 1.46%   | 12 | 1.25%   | 12 | 1.34%   | 10 | 2.05%   |
| Cervix uteri cancer                | 12 | 1.37%   | 13 | 1.18%   | 13 | 0.99%   | 12 | 1.73%   |
| Bladder cancer                     | 13 | 1.15%   | 11 | 1.39%   | 14 | 0.84%   | 13 | 1.18%   |
| Corpus uteri cancer                | 14 | 0.77%   | 14 | 0.86%   | 11 | 1.60%   | 15 | 0.80%   |
| Melanoma and other skin cancers    | 15 | 0.51%   | 15 | 0.53%   | 16 | 0.41%   | 17 | 0.50%   |
| Ovary cancer                       | 16 | 0.39%   | 17 | 0.34%   | 17 | 0.38%   | 16 | 0.74%   |
| Prostate cancer                    | 17 | 0.24%   | 16 | 0.38%   | 15 | 0.58%   | 14 | 0.97%   |
| <b>Cardiovascular diseases</b>     |    |         |    |         |    |         |    |         |
| <b>total</b>                       |    | 100.00% |    | 100.00% |    | 100.00% |    | 100.00% |
| Cerebrovascular disease            | 1  | 50.25%  | 1  | 57.19%  | 1  | 58.41%  | 1  | 48.08%  |
| Hypertensive heart disease         | 2  | 16.02%  | 4  | 10.20%  | 3  | 5.05%   | 3  | 7.54%   |
| Other cardiovascular diseases      | 3  | 13.34%  | 3  | 10.58%  | 4  | 3.11%   | 4  | 3.60%   |
| Ischemic heart disease             | 4  | 13.24%  | 2  | 18.33%  | 2  | 31.89%  | 2  | 39.47%  |
| Rheumatic heart disease            | 5  | 7.16%   | 5  | 3.71%   | 5  | 1.54%   | 5  | 1.31%   |

CMNN: communicable, maternal, neonatal, and nutritional diseases; NCD: non-communicable diseases.

\*1 represents the highest rank.

**Table S4. Changes in Gini coefficients, reranking, and proportionality of neoplasms and cardiovascular diseases for the combined and, male, female, rural, and urban categories, from 1991 to 2019**

|                                | <b>Both</b> | <b>Male</b> | <b>Female</b> | <b>Urban</b> | <b>Rural</b> |
|--------------------------------|-------------|-------------|---------------|--------------|--------------|
| <b>Neoplasms</b>               |             |             |               |              |              |
| <i>Gini index</i>              |             |             |               |              |              |
| 1991                           | 0.599       | 0.658       | 0.523         | 0.582        | 0.622        |
| 2000                           | 0.602       | 0.664       | 0.525         | 0.587        | 0.622        |
| 2010                           | 0.588       | 0.659       | 0.506         | 0.565        | 0.610        |
| 2019                           | 0.569       | 0.608       | 0.492         | 0.556        | 0.576        |
| <i>Reranking</i>               |             |             |               |              |              |
| 1991-2000                      | 0.007       | 0.010       | 0.003         | 0.003        | 0.009        |
| 2000-2010                      | 0.005       | 0.001       | 0.004         | 0.003        | 0.018        |
| 2010-2019                      | 0.004       | 0.030       | 0.016         | 0.001        | 0.007        |
| 1991-2019                      | 0.050       | 0.073       | 0.056         | 0.010        | 0.072        |
| <i>Proportionality</i>         |             |             |               |              |              |
| 1991-2000                      | 0.003       | 0.004       | 0.001         | -0.001       | 0.009        |
| 2000-2010                      | 0.019       | 0.006       | 0.023         | 0.024        | 0.030        |
| 2010-2019                      | 0.024       | 0.081       | 0.029         | 0.010        | 0.042        |
| 1991-2019                      | 0.081       | 0.124       | 0.087         | 0.036        | 0.118        |
| <b>Cardiovascular diseases</b> |             |             |               |              |              |
| <i>Gini index</i>              |             |             |               |              |              |
| 1991                           | 0.374       | 0.396       | 0.350         | 0.384        | 0.356        |
| 2000                           | 0.468       | 0.489       | 0.440         | 0.393        | 0.462        |
| 2010                           | 0.547       | 0.557       | 0.535         | 0.415        | 0.566        |
| 2019                           | 0.514       | 0.523       | 0.503         | 0.393        | 0.519        |
| <i>Reranking</i>               |             |             |               |              |              |
| 1991-2000                      | 0.002       | 0.001       | 0.046         | 0.011        | 0.034        |
| 2000-2010                      | 0.004       | 0.002       | 0.006         | 0.000        | 0.007        |
| 2010-2019                      | 0.000       | 0.000       | 0.000         | 0.005        | 0.000        |
| 1991-2019                      | 0.000       | 0.000       | 0.133         | 0.000        | 0.128        |
| <i>Proportionality</i>         |             |             |               |              |              |
| 1991-2000                      | -0.092      | -0.092      | -0.044        | 0.002        | -0.072       |
| 2000-2010                      | -0.076      | -0.066      | -0.089        | -0.022       | -0.097       |
| 2010-2019                      | 0.033       | 0.034       | 0.032         | 0.026        | 0.048        |
| 1991-2019                      | -0.140      | -0.127      | -0.020        | -0.009       | -0.035       |

**Table S5. Changes in contributory percentage of the demographic structure and non-demographic factors to the year- and sex-specific crude mortality difference of neoplasm and cardiovascular diseases, from 1991 to 2019**

|                                    | <b>Mortality<br/>Difference</b> | <b>Demographic<br/>Structure</b> | <b>Non-demographic<br/>Factors</b> |
|------------------------------------|---------------------------------|----------------------------------|------------------------------------|
| <b>Neoplasms</b>                   |                                 |                                  |                                    |
| <i>Both</i>                        |                                 |                                  |                                    |
| 1991-2000                          | 22.745                          | 17.56%                           | 7.65%                              |
| 2000-2010                          | 24.081                          | 18.30%                           | 3.02%                              |
| 2010-2019                          | 25.410                          | 35.40%                           | -16.86%                            |
| 1991-2019                          | 72.235                          | 84.58%                           | -4.51%                             |
| <i>Male</i>                        |                                 |                                  |                                    |
| 1991-2000                          | 29.505                          | 18.60%                           | 7.44%                              |
| 2000-2010                          | 31.627                          | 18.28%                           | 3.87%                              |
| 2010-2019                          | 32.626                          | 36.06%                           | -17.35%                            |
| 1991-2019                          | 93.758                          | 87.22%                           | -4.46%                             |
| <i>Female</i>                      |                                 |                                  |                                    |
| 1991-2000                          | 15.702                          | 16.76%                           | 6.92%                              |
| 2000-2010                          | 16.123                          | 17.62%                           | 2.03%                              |
| 2010-2019                          | 18.328                          | 35.65%                           | -16.97%                            |
| 1991-2019                          | 50.153                          | 82.04%                           | -6.40%                             |
| <i>Urban</i>                       |                                 |                                  |                                    |
| 1991-2000                          | 14.468                          | 19.47%                           | -7.71%                             |
| 2000-2010                          | 7.612                           | 17.24%                           | -11.71%                            |
| 2010-2019                          | 17.914                          | 26.63%                           | -14.29%                            |
| 1991-2019                          | 39.993                          | 67.14%                           | -34.65%                            |
| <i>Rural</i>                       |                                 |                                  |                                    |
| 1991-2000                          | 24.026                          | 16.29%                           | 13.47%                             |
| 2000-2010                          | 27.341                          | 15.40%                           | 10.70%                             |
| 2010-2019                          | 30.033                          | 41.97%                           | -19.23%                            |
| 1991-2019                          | 81.400                          | 91.35%                           | 9.48%                              |
| <b>Cardiovascular<br/>diseases</b> |                                 |                                  |                                    |
| <i>Both</i>                        |                                 |                                  |                                    |
| 1991-2000                          | 44.582                          | 24.76%                           | 3.78%                              |
| 2000-2010                          | 37.284                          | 7.60%                            | 10.96%                             |
| 2010-2019                          | 79.416                          | 56.81%                           | -23.46%                            |
| 1991-2019                          | 161.282                         | 107.63%                          | -4.41%                             |
| <i>Male</i>                        |                                 |                                  |                                    |
| 1991-2000                          | 51.266                          | 26.31%                           | 5.45%                              |
| 2000-2010                          | 46.201                          | 9.09%                            | 12.63%                             |
| 2010-2019                          | 78.670                          | 53.82%                           | -23.43%                            |
| 1991-2019                          | 176.138                         | 111.18%                          | -2.08%                             |
| <i>Female</i>                      |                                 |                                  |                                    |



---

|              |         |         |         |
|--------------|---------|---------|---------|
| 1991-2000    | 37.431  | 23.44%  | 1.35%   |
| 2000-2010    | 28.051  | 5.53%   | 9.36%   |
| 2010-2019    | 80.390  | 61.30%  | -24.17% |
| 1991-2019    | 145.872 | 104.75% | -8.14%  |
| <b>Urban</b> |         |         |         |
| 1991-2000    | 39.771  | 27.36%  | -5.23%  |
| 2000-2010    | -0.889  | 14.29%  | -14.69% |
| 2010-2019    | 69.701  | 47.72%  | -15.84% |
| 1991-2019    | 108.582 | 95.77%  | -35.36% |
| <b>Rural</b> |         |         |         |
| 1991-2000    | 45.046  | 23.43%  | 6.72%   |
| 2000-2010    | 55.518  | 0.58%   | 27.97%  |
| 2010-2019    | 82.682  | 64.00%  | -30.93% |
| 1991-2019    | 183.246 | 111.89% | 10.74%  |

---
